# Supplementary material for: Magnetoencephalography and High-Density Electroencephalography Study of Acoustic Event Related Potentials in Early Stage of Multiple Sclerosis: A Pilot Study on Cognitive Impairment and Fatigue
Source: MDPI journal article supplement (doi:10.3390/brainsci11040481), 2021-04-09
Supplement: s1 [file s1]

**Figure S1-S2:** Mean values and confidence intervals of latency (Figure S1) and amplitude (Figure S2) of main ERPs by odd ball paradigm in pwMS and HCs.

**Figure S1**

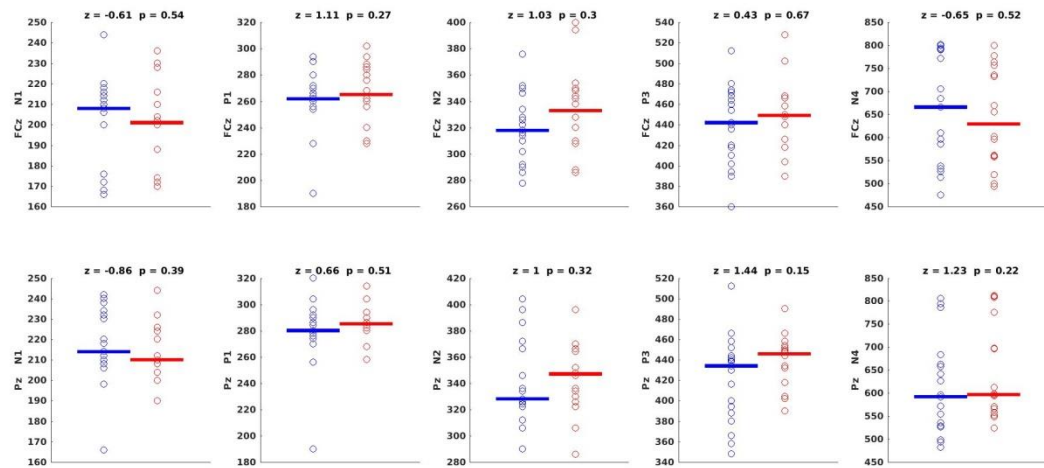

**Figure S2**

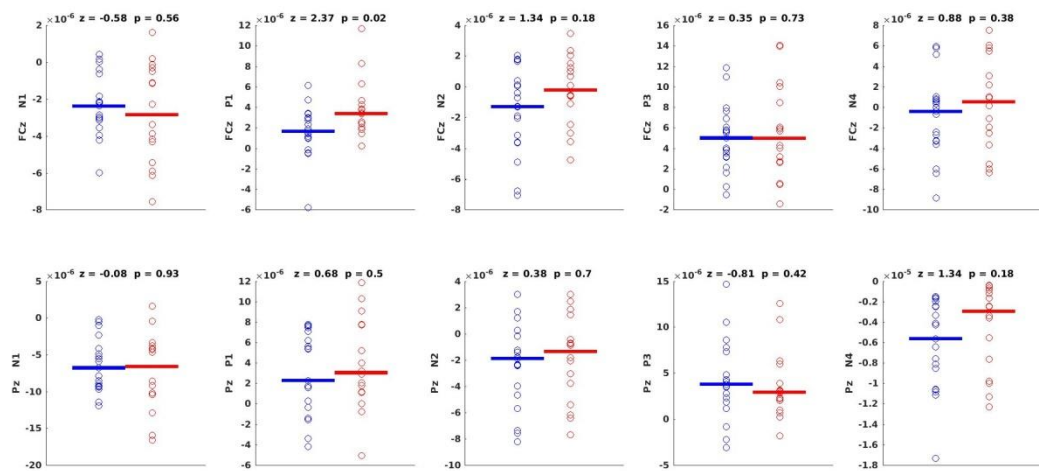

**Figure S3.** Topographical representation of Grand Average of ERP-ERF peaks in 16 pwMS (above) and 19 HCs (below).

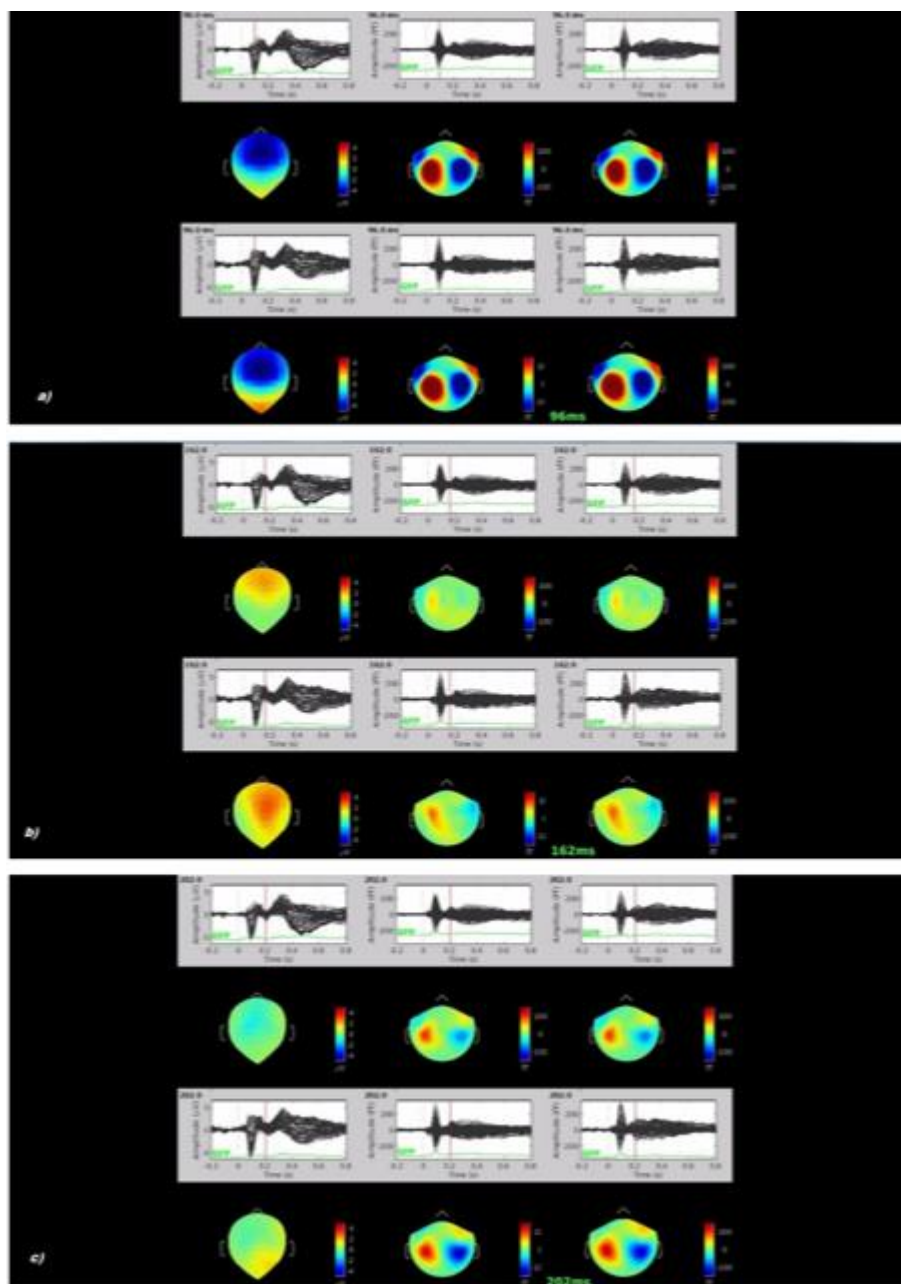

From left to right: EEG-ERP, MEG-magnetometers-ERF, MEG-gradiometers-ERF. a) N1 component; b) P2 component; c) N2 component

**Figure S4** Deviant trial.

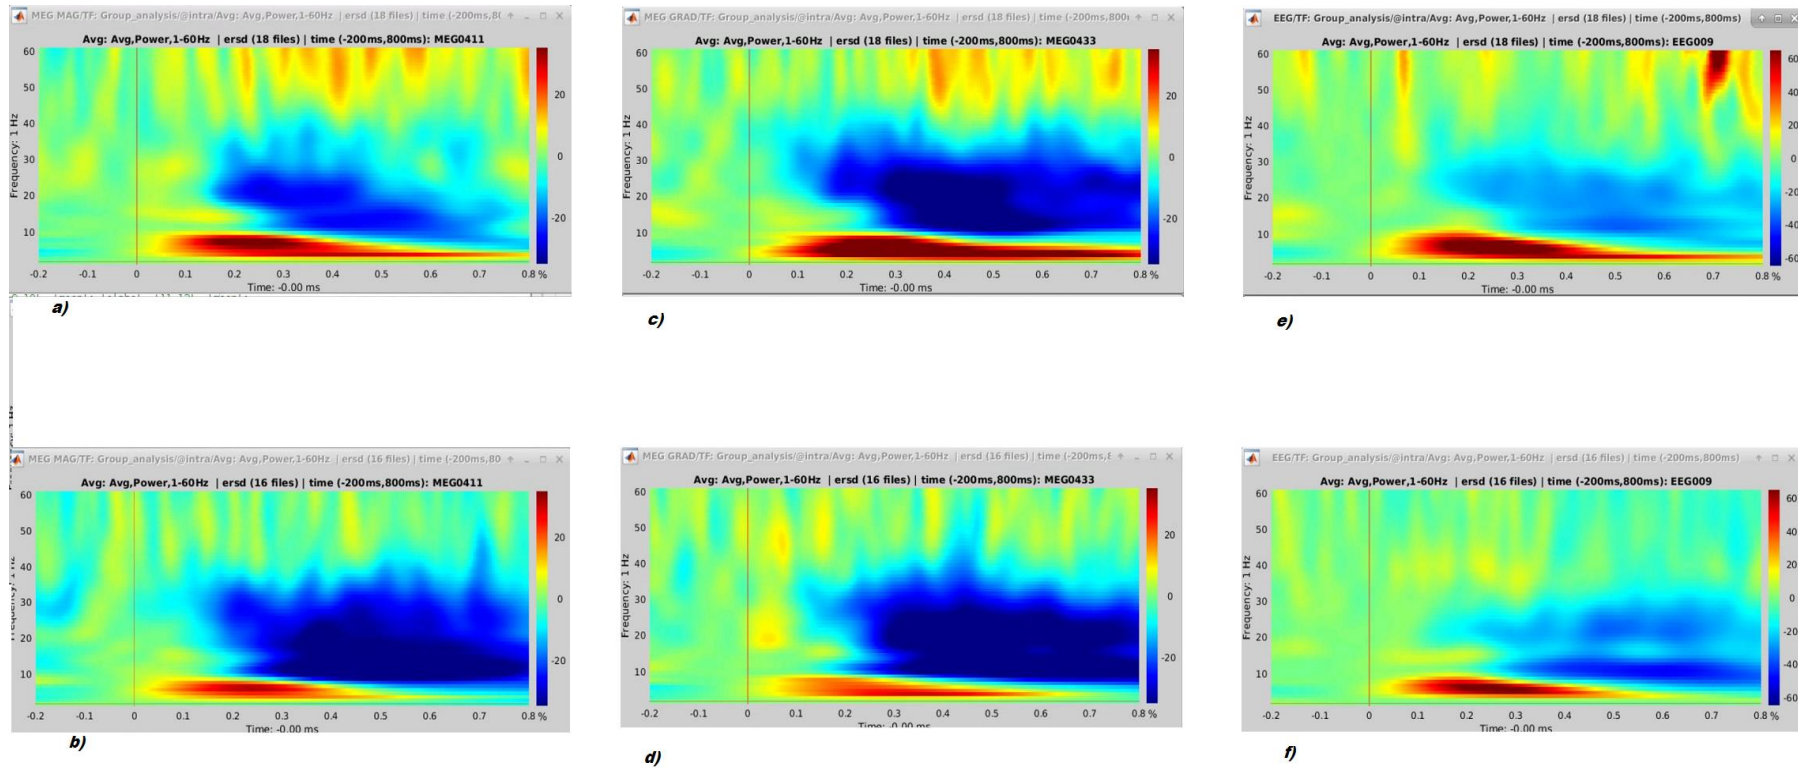

Representative parietal midline gradiometer (a,b), magnetometer (c,d) and EEG derivation (e,f) for controls (top) and patients (bottom). The gradiometers showed a not significant increase of negative modulation induced by deviant stimulus in patients as compared to controls.
